# Supplementary material for: DNA Methylation Signatures of Multiple Sclerosis Occur Independently of Known Genetic Risk and Are Primarily Attributed to B Cells and Monocytes
Source: MDPI journal article supplement (doi:10.3390/ijms241612576), 2023-08-08
Supplement: s1 [file Supplementary figures_and_tables.pdf › Supplementary figures_and_tables.pdf]

**Supplementary table 1. Group Characteristics.**

|                            | Discovery         | Replication 1      | Replication 2      |
|----------------------------|-------------------|--------------------|--------------------|
| Sex                        |                   |                    |                    |
| Female (N)                 | 466               | 202                | 337                |
| Male (N)                   | 141               | 77                 | 0                  |
| M:F ratio                  | 0.30              | 0.38               | 0                  |
| Group                      |                   |                    |                    |
| MS Case (N)                | 208               | 140                | 235                |
| Non-MS Control (N)         | 402               | 139                | 102                |
| Case:Control ratio         | 0.52              | 1.01               | 2.30               |
| Age                        |                   |                    |                    |
| Mean ( $\pm$ SD)           | 38.8 ( $\pm$ 9.4) | 41.2 ( $\pm$ 11.2) | 51.8 ( $\pm$ 11.0) |
| Smoker Status (cases only) |                   |                    |                    |
| Ever (N)                   | 131               | 71                 | N/A                |
| Never (N)                  | 75                | 69                 | N/A                |
| No data                    | 2                 | 0                  | N/A                |

**Supplementary Table 2: The 13 DMPs at the HLA-DRB locus in all three groups.** All DMPs with  $\Delta\beta > 2\%$  and genome-wide significant in the discovery group as well as  $FDR \leq 0.05$  and  $\Delta\beta > 2\%$  in both validation cohorts.  $\Delta\beta$  = delta beta

| CpG        | Chr | Position | Gene     | Feature | Discovery Cohort $\Delta\beta$ | Discovery Cohort p-value | Validation Cohort 1 $\Delta\beta$ | Validation Cohort 1 p-value | Validation Cohort 2 $\Delta\beta$ | Validation Cohort 2 p-value |
|------------|-----|----------|----------|---------|--------------------------------|--------------------------|-----------------------------------|-----------------------------|-----------------------------------|-----------------------------|
| cg01341801 | 6   | 32489203 | HLA-DRB5 | Body    | 0.192                          | 3.43E-11                 | 0.212                             | 6.51E-07                    | 0.276                             | 1.94E-05                    |
| cg25140213 | 6   | 32522683 | HLA-DRB6 | Body    | 0.187                          | 3.14E-10                 | 0.189                             | 1.63E-06                    | 0.238                             | 4.55E-05                    |
| cg17369694 | 6   | 32485396 | HLA-DRB5 | 3'UTR   | 0.155                          | 2.65E-11                 | 0.174                             | 1.90E-06                    | 0.217                             | 1.46E-04                    |
| cg09139047 | 6   | 32552042 | HLA-DRB1 | Body    | -0.135                         | 1.36E-08                 | -0.162                            | 2.70E-06                    | -0.175                            | 2.70E-03                    |
| cg14645244 | 6   | 32552205 | HLA-DRB1 | Body    | -0.122                         | 7.18E-10                 | -0.131                            | 6.30E-07                    | -0.128                            | 2.46E-04                    |
| cg10632894 | 6   | 32552453 | HLA-DRB1 | Body    | -0.12                          | 6.55E-08                 | -0.127                            | 2.01E-06                    | -0.207                            | 5.35E-05                    |
| cg08845336 | 6   | 32551891 | HLA-DRB1 | Body    | -0.119                         | 4.01E-09                 | -0.14                             | 2.16E-06                    | -0.137                            | 4.94E-05                    |
| cg10104420 | 6   | 32526414 | HLA-DRB6 | Body    | -0.107                         | 1.96E-09                 | -0.135                            | 5.60E-07                    | -0.071                            | 3.11E-02                    |
| cg19575208 | 6   | 32551888 | HLA-DRB1 | Body    | -0.105                         | 3.55E-09                 | -0.121                            | 3.26E-06                    | -0.128                            | 9.10E-05                    |
| cg17416722 | 6   | 32554385 | HLA-DRB1 | Body    | 0.096                          | 4.67E-11                 | 0.105                             | 1.88E-06                    | 0.14                              | 2.72E-04                    |
| cg00440797 | 6   | 32493873 | HLA-DRB5 | Body    | 0.079                          | 5.40E-10                 | 0.07                              | 5.95E-05                    | 0.124                             | 1.24E-04                    |
| cg00579921 | 6   | 32489991 | HLA-DRB5 | Body    | 0.064                          | 7.06E-08                 | 0.051                             | 6.31E-04                    | 0.101                             | 6.14E-03                    |
| cg26036029 | 6   | 32552443 | HLA-DRB1 | Body    | -0.061                         | 4.72E-08                 | -0.042                            | 5.30E-05                    | -0.076                            | 8.69E-05                    |
| cg22930808 | 3   | 12228188 | PARP9    | 5'UTR   | -0.043                         | 6.66E-08                 | -0.079                            | 8.45E-08                    | -0.088                            | 5.90E-04                    |
| cg01028142 | 2   | 7004578  | CMPK2    | Body    | -0.036                         | 6.28E-12                 | -0.039                            | 4.77E-06                    | -0.062                            | 1.57E-05                    |
| cg01533966 | 1   | 90363165 | LRR8D    | 5'UTR   | 0.03                           | 1.41E-12                 | 0.019                             | 3.94E-02                    | 0.03                              | 2.47E-02                    |

|            |    |          |         |       |        |          |        |          |        |          |
|------------|----|----------|---------|-------|--------|----------|--------|----------|--------|----------|
| cg01311537 | 10 | 50386709 | TMEM273 | Body  | -0.021 | 4.98E-08 | -0.017 | 7.78E-03 | -0.035 | 4.08E-03 |
| cg10778971 | 14 | 94577101 | IFI27   | 5'UTR | -0.02  | 4.43E-12 | -0.014 | 1.15E-03 | -0.014 | 9.12E-03 |

**Supplementary Table 3 – IFN-related DMPs in Ausimmune before and after removal of IFN treated samples**

| CpG        | Chromosome | Position  | Gene          | Only<br>Untreated<br>$\Delta\beta$ | Only<br>Untreated p-<br>value | All<br>Samples<br>$\Delta\beta$ | All Samples<br>p-value |
|------------|------------|-----------|---------------|------------------------------------|-------------------------------|---------------------------------|------------------------|
| cg01028142 | 2          | 7004578   | <i>CMPK2</i>  | -0.02                              | 3.50E-07                      | -0.036                          | 6.28E-12               |
| cg01533966 | 1          | 90363165  | <i>LRRC8D</i> | 0.03                               | 2.21E-11                      | 0.03                            | 1.41E-12               |
| cg10778971 | 14         | 94577101  | <i>IFI27</i>  | -0.01                              | 2.06E-08                      | -0.02                           | 4.43E-12               |
| cg22930808 | 3          | 122281881 | <i>PARP9</i>  | -0.03                              | 3.26E-04                      | -0.043                          | 6.66E-08               |

**Supplementary Table 4: DMRs in the combined cohort.**

| Chromosome | Start    | End      | Width | Number<br>of CpGs | Min<br>Smoothed<br>FDR | Maximum<br>Difference | Mean<br>Difference | Overlapping<br>Genes | DMR<br>Index |
|------------|----------|----------|-------|-------------------|------------------------|-----------------------|--------------------|----------------------|--------------|
| chr6       | 32548321 | 32550067 | 1747  | 10                |                        | 0.161                 | 0.051              | HLA-DRB1             | 1            |
| chr6       | 32551749 | 32552670 | 922   | 19                |                        | -0.167                | -0.077             | HLA-DRB1             | 2            |
| chr6       | 32553920 | 32556093 | 2174  | 5                 |                        | 0.109                 | 0.059              | HLA-DRB1             | 3            |

|      |          |          |      |    |        |        |          |   |
|------|----------|----------|------|----|--------|--------|----------|---|
| chr6 | 32557422 | 32558459 | 1038 | 5  | 0.126  | 0.029  | HLA-DRB1 | 4 |
| chr6 | 32489203 | 32490444 | 1242 | 12 | 0.182  | 0.056  | HLA-DRB5 | 5 |
| chr6 | 32520615 | 32523136 | 2522 | 11 | 0.152  | 0.064  | HLA-DRB6 | 6 |
| chr6 | 32525805 | 32526702 | 898  | 12 | 0.117  | 0.034  | HLA-DRB6 | 7 |
| chr6 | 32604564 | 32610971 | 6408 | 24 | 0.113  | 0.043  | HLA-DQA1 | 8 |
| chr6 | 32632000 | 32636189 | 4190 | 40 | -0.111 | -0.012 | HLA-DQB1 | 9 |

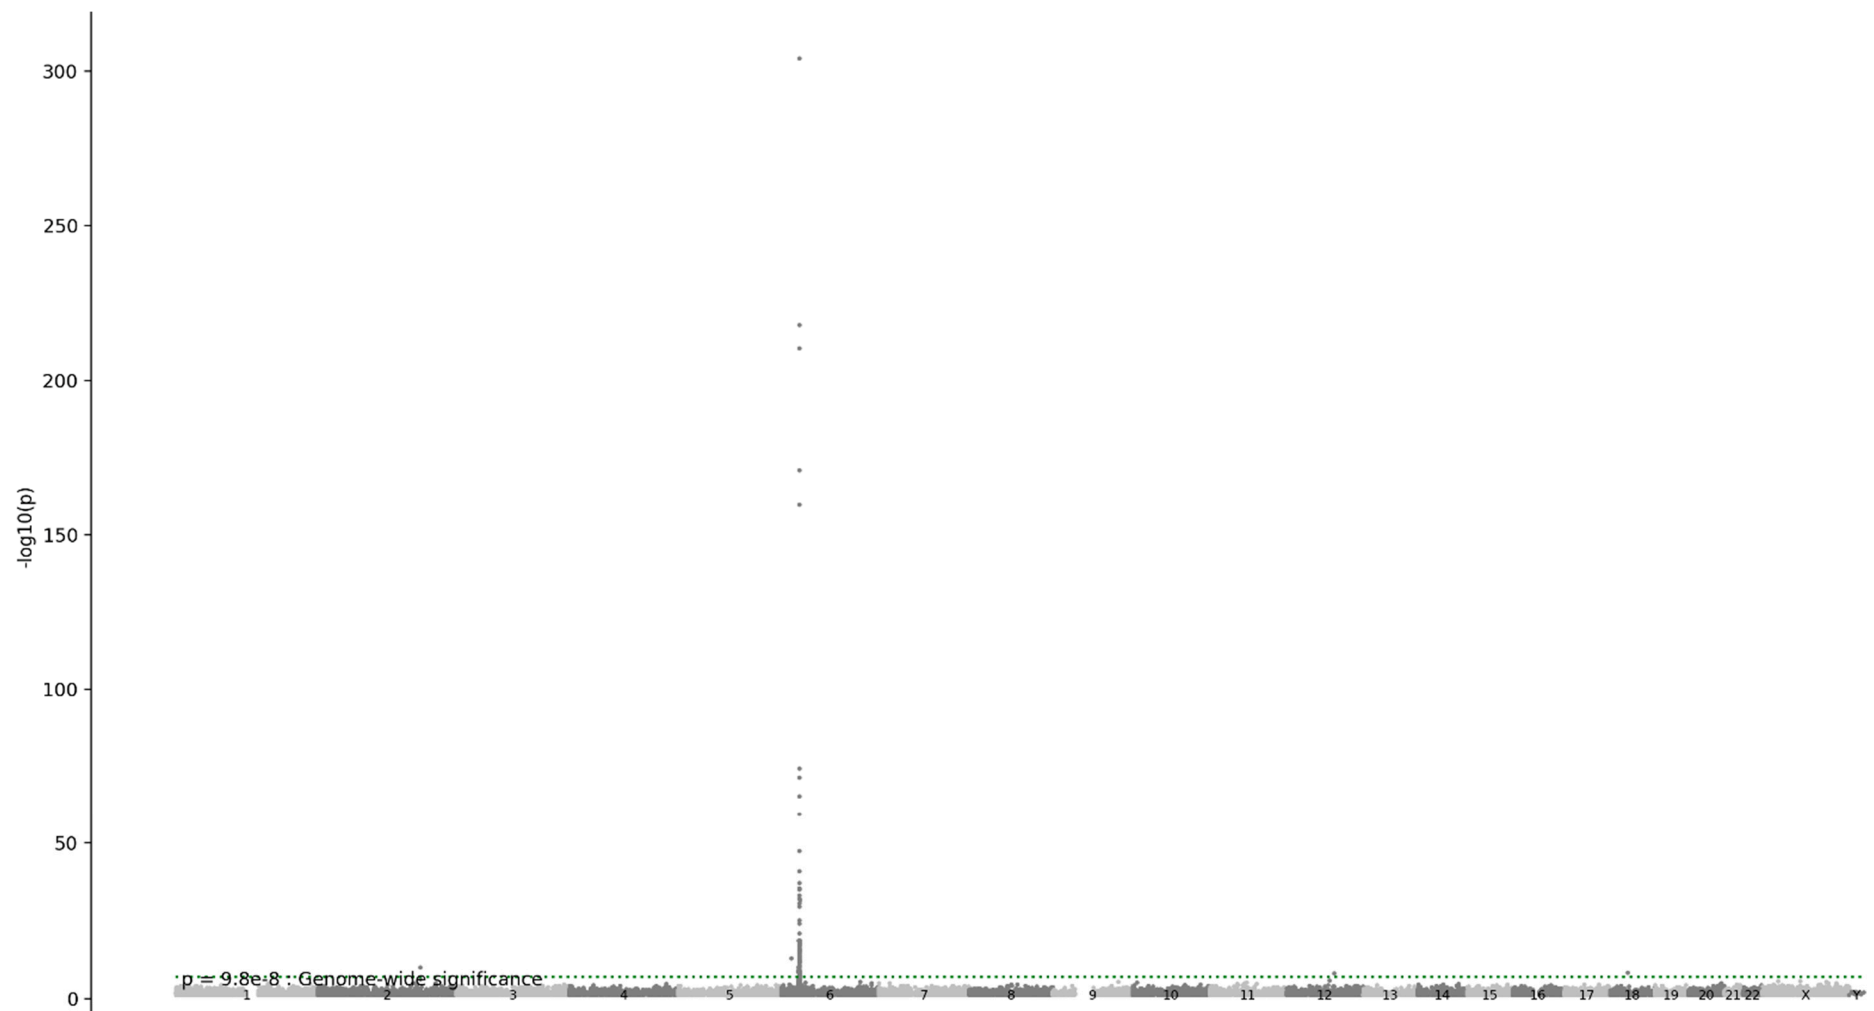

**Supplementary figure 1: Manhattan plot showing the magnitude of the *HLA-DRB1 15:01* Haplotype on methylation.** Each dot represents the  $-\log_{10}(p\text{-value})$  of the ANOVA test between Risk Haplotype *HLA-DRB1 15:01* (Presence/Absence) and CpG. Chromosomes are shown with alternating shades of grey)

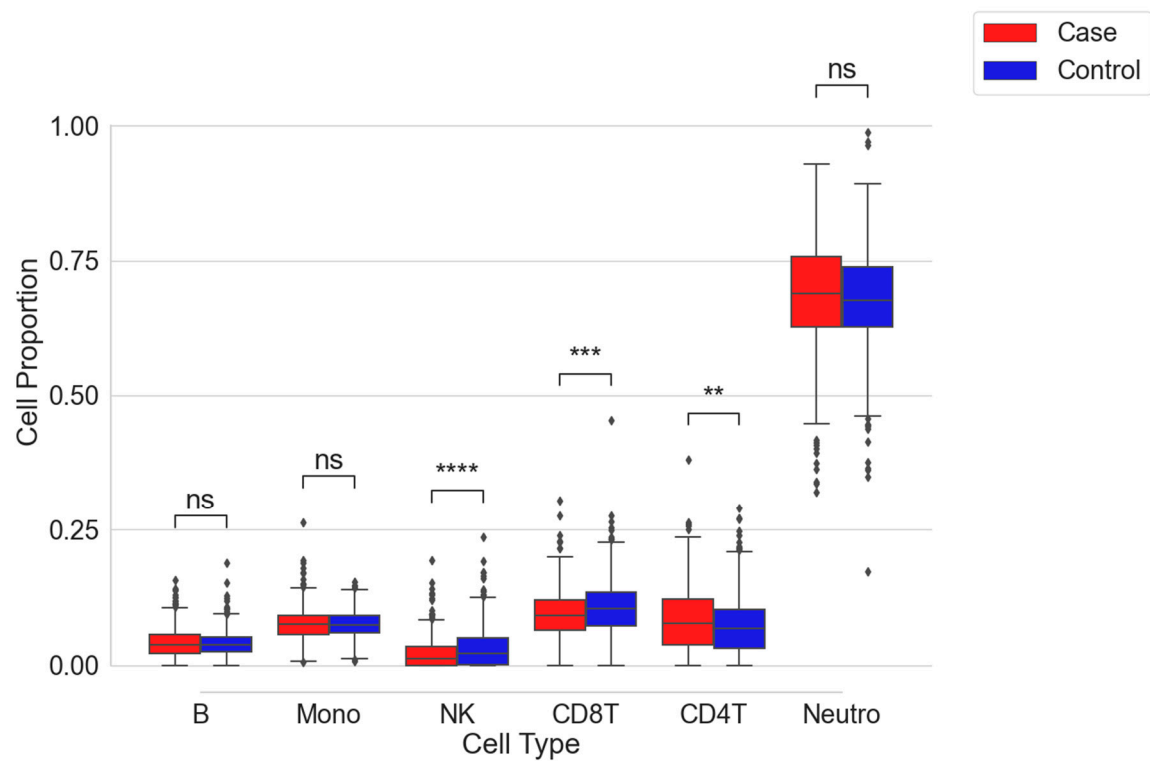

**Supplemental Figure 2: Cell proportion differences between cases and controls using the combined cohort**

Tukey Box Plot showing mean and interquartile range of cases (blue) and controls (orange) in all datasets. Black diamonds indicate outliers. \*\*  $P < 0.01$ , \*\*\*  $P < 0.001$ , \*\*\*\*  $P < 0.0001$ , ns = not significant.

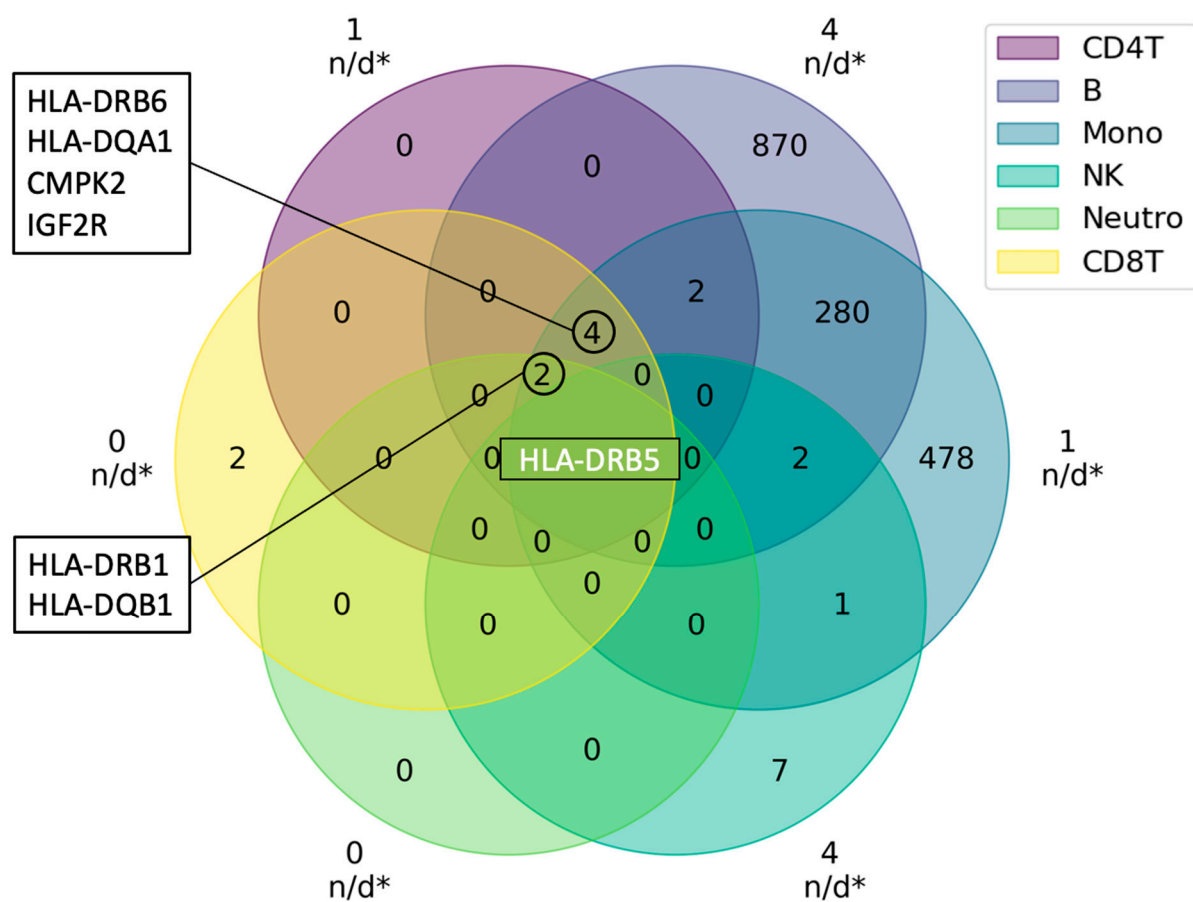

**Supplementary Figure 3. Overlap of DMPs among cell subtypes.** Venn diagram showing overlap of csDMPs in the combined cohort, between all the cell types. \*denotes elements of set intersections that are not displayed. For example, only shared between CD4<sup>+</sup>T cells and NK cells.

**Supplementary Table 5: Overlapping csDMP effect size.** Effect size, chromosome location (CHR) and gene name for the 28 csDMPs which overlap between all 4 major cell types. Red = hypomethylated blue = hypermethylated. Darker shade indicates larger effect size.

| csDMP      | B Cell | Mono   | CD8 <sup>+</sup> T<br>Cells | CD4 <sup>+</sup> T<br>Cells | CHR | Position  | gene     |
|------------|--------|--------|-----------------------------|-----------------------------|-----|-----------|----------|
| cg01028142 | -4.70  | -3.61  | -2.06                       | -2.65                       | 2   | 7004578   | CMPK2    |
| cg10187879 | 4.61   | 2.57   | 2.14                        | 2.20                        | 6   | 32223208  |          |
| cg17369694 | 23.92  | 18.85  | 11.44                       | 12.80                       | 6   | 32485396  | HLA-DRB5 |
| cg01341801 | 26.79  | 21.29  | 12.76                       | 14.76                       | 6   | 32489203  | HLA-DRB5 |
| cg26981746 | 12.24  | 9.82   | 5.46                        | 6.64                        | 6   | 32490012  | HLA-DRB5 |
| cg27362989 | 16.56  | 12.99  | 7.63                        | 9.32                        | 6   | 32492198  | HLA-DRB5 |
| cg19516921 | 8.63   | 6.97   | 3.90                        | 5.11                        | 6   | 32493994  | HLA-DRB5 |
| cg19774683 | 18.72  | 14.64  | 8.71                        | 10.18                       | 6   | 32522400  | HLA-DRB6 |
| cg25140213 | 16.27  | 12.93  | 7.61                        | 8.88                        | 6   | 32522683  | HLA-DRB6 |
| cg06559318 | 17.40  | 12.78  | 7.29                        | 9.57                        | 6   | 32526260  | HLA-DRB6 |
| cg10104420 | -11.81 | -8.97  | -5.31                       | -5.91                       | 6   | 32526414  | HLA-DRB6 |
| cg04422742 | 20.09  | 14.78  | 8.70                        | 10.26                       | 6   | 32527793  | HLA-DRB6 |
| cg26590106 | 16.53  | 12.43  | 7.58                        | 9.28                        | 6   | 32548321  | HLA-DRB1 |
| cg12867728 | 4.89   | 2.69   | 2.30                        | 2.62                        | 6   | 32549283  | HLA-DRB1 |
| cg20022036 | -8.67  | -5.39  | -3.94                       | -4.52                       | 6   | 32549496  | HLA-DRB1 |
| cg13910785 | 20.98  | 16.20  | 10.21                       | 10.69                       | 6   | 32549849  | HLA-DRB1 |
| cg11404906 | -19.94 | -14.89 | -9.26                       | -10.79                      | 6   | 32551749  | HLA-DRB1 |
| cg19575208 | -10.61 | -8.05  | -4.95                       | -5.70                       | 6   | 32551888  | HLA-DRB1 |
| cg08845336 | -12.48 | -9.78  | -5.94                       | -6.93                       | 6   | 32551891  | HLA-DRB1 |
| cg15568074 | -22.68 | -16.42 | -9.60                       | -11.01                      | 6   | 32551949  | HLA-DRB1 |
| cg16514085 | -22.42 | -17.84 | -10.42                      | -11.51                      | 6   | 32552152  | HLA-DRB1 |
| cg14645244 | -15.93 | -13.15 | -7.17                       | -8.67                       | 6   | 32552205  | HLA-DRB1 |
| cg10632894 | -16.62 | -13.47 | -7.92                       | -9.55                       | 6   | 32552453  | HLA-DRB1 |
| cg05383619 | 11.50  | 9.67   | 5.23                        | 6.40                        | 6   | 32553920  | HLA-DRB1 |
| cg17416722 | 16.44  | 13.60  | 7.80                        | 9.03                        | 6   | 32554385  | HLA-DRB1 |
| cg02919082 | 8.48   | 6.21   | 3.87                        | 4.22                        | 6   | 32605694  | HLA-DQA1 |
| cg05341252 | -24.25 | -17.33 | -10.70                      | -11.03                      | 6   | 32632715  | HLA-DQB1 |
| cg04733681 | 4.81   | 3.41   | 2.21                        | 2.53                        | 6   | 160423822 | IGF2R    |



a)

|              | NK | B cell | Monocytes | Neutrophils | CD8T | CD4T |
|--------------|----|--------|-----------|-------------|------|------|
| <b>Total</b> | 0  | 924    | 1327      | 4           | 475  | 48   |
| <b>Hypo</b>  | 0  | 517    | 816       | 1           | 361  | 23   |
| <b>Hyper</b> | 0  | 407    | 511       | 3           | 114  | 25   |

b)

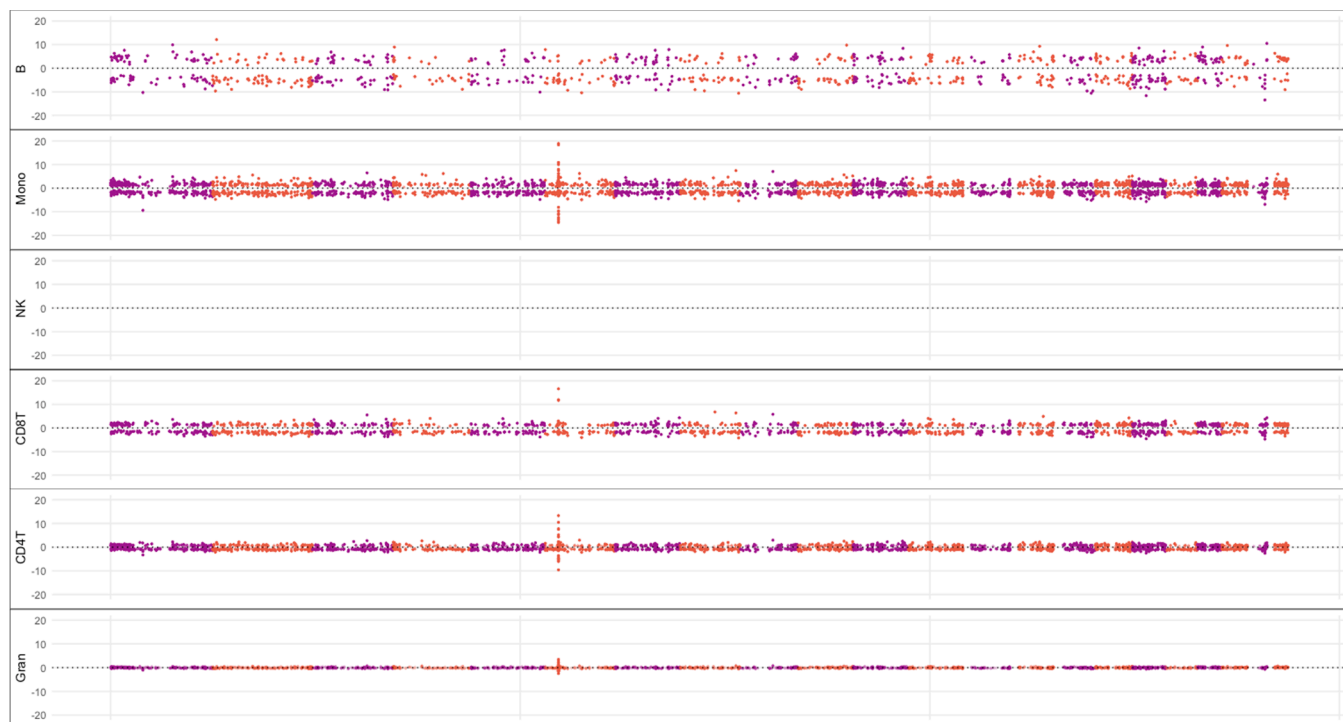

**Supplementary Figure 4: Genome-wide cell-specific DNA methylation profile in discovery group only.**

a) Total number of csDMPs by cell type and breakdown by hyper and hypomethylated. b) Manhattan plot representing genome-wide effect size for all csDMPs, by cell type. The Y axis represents the model estimate for effect size and X axis represents genome-coordinates, chromosomes are in chronological order and represented by alternating colors.

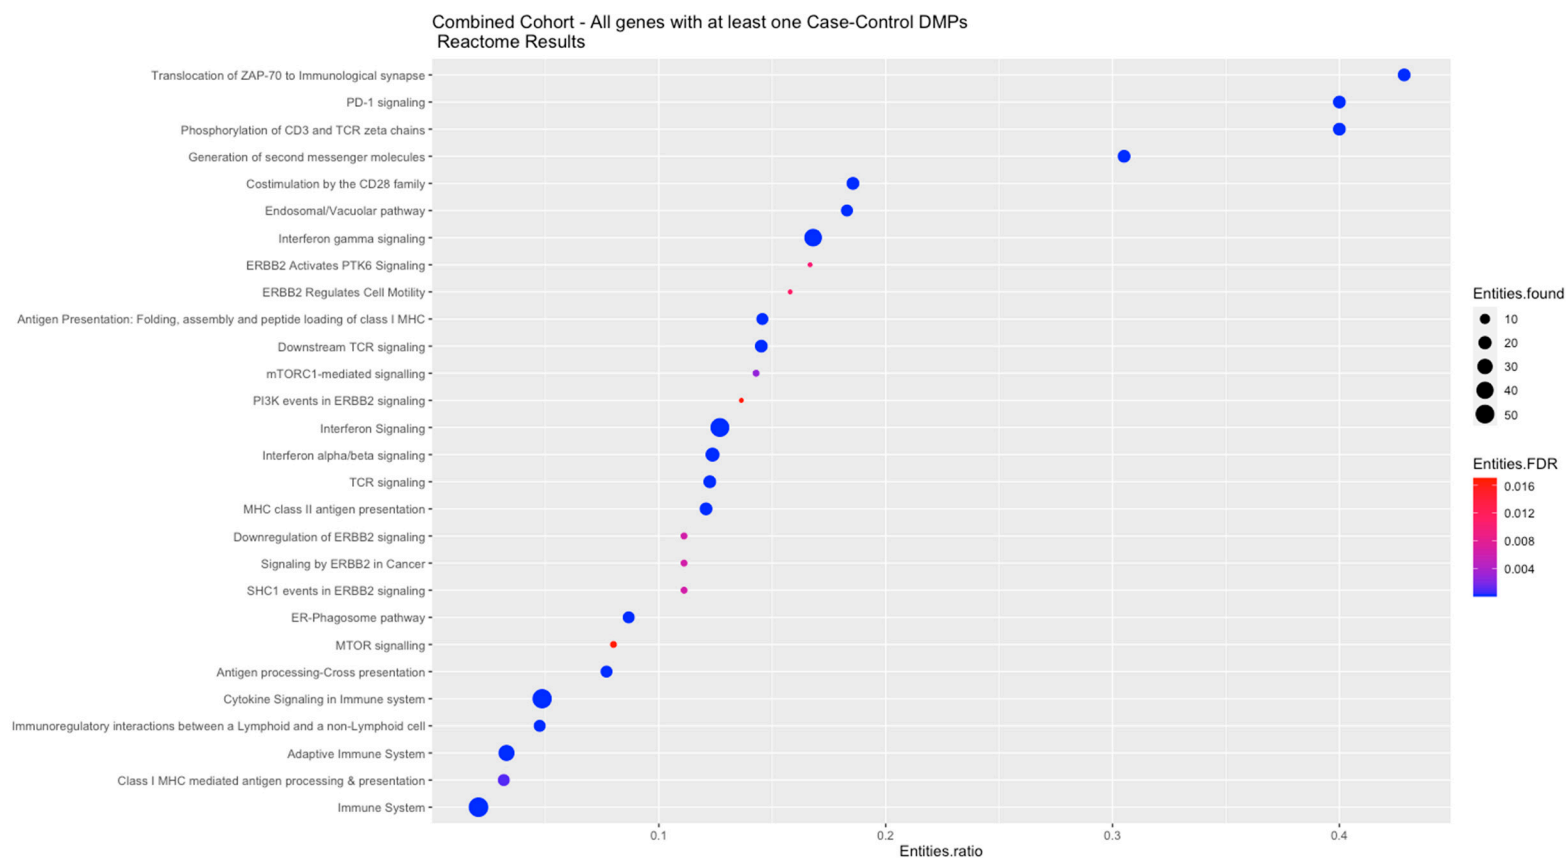

### Supplementary Figure 5: Whole-Blood over-representation analysis

Using a ranked gene-list with 92 genes containing at least one DMP mapped to a gene with absolute  $\Delta\beta$  above 2%. Y axis represents all pathways identified. X axis represents the gene ratio (number of entities in gene list vs number of entities in the pathway) for a specific pathway. Marker size represents the number of Entities. Colour represents significance.

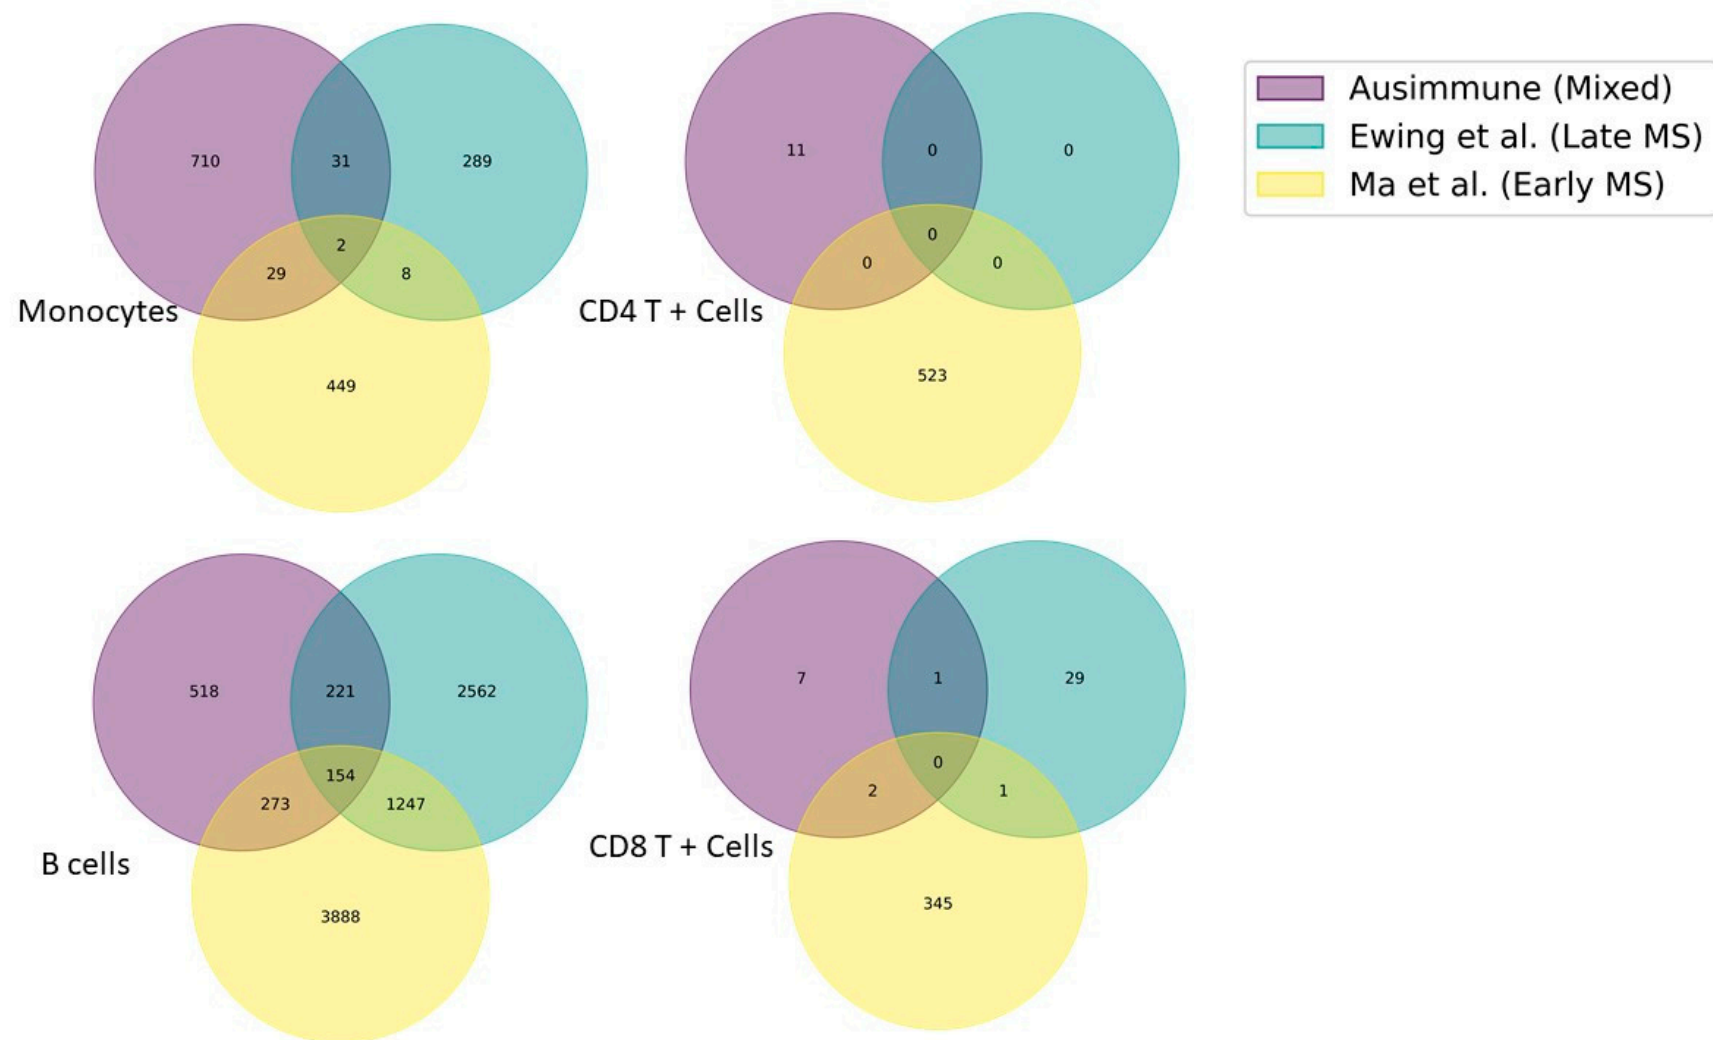

**Supplementary Figure 6: Overlap of Genes containing at least one csDMP identified in this study, Ewing et al. [47] and Ma et al. [33] Study.**
